# Supplementary material for: Large electrocaloric response with superior temperature stability in NaNbO3-based relaxor ferroelectrics benefiting from the crossover region
Source: Royal Society of Chemistry journal article supplement (doi:10.1039/d0ta11423e), 2020-12-19
Supplement: d0ta11423e1.pdf [file d0ta11423e1.pdf]

## Supporting Information for

Large electrocaloric response with superior temperature stability in NaNbO<sub>3</sub>-  
based relaxor ferroelectrics benefiting from crossover region

Ling Zhang, Chunlin Zhao, Ting Zheng and Jiagang Wu\*

*Department of Materials Science, Sichuan University, Chengdu, 610064, China*

\*Corresponding author. Email: msewujg@scu.edu.cn and wujiagang0208@163.com

**Table S1:** Lattice parameters and refined structure parameters of NN-BT- $x$ BZ ceramics.

| Sample       | $x = 0.04$     |               | $x = 0.05$ |
|--------------|----------------|---------------|------------|
| Space group  | $P4mm$ (35.3%) | $R3c$ (64.7%) | $Pm-3m$    |
| $a$ (Å)      | 3.9459         | 5.5903        | 3.9492     |
| $c$ (Å)      | 3.9421         | -             | -          |
| $\alpha$ (°) | 90             | 90.02         | 90         |
| Sig          | 1.34           | 1.86          | 1.86       |
| $R_{wp}$ (%) | 5.27           | 7.43          | 7.43       |
| $c/a$        | 1.001          | 1             | 1          |

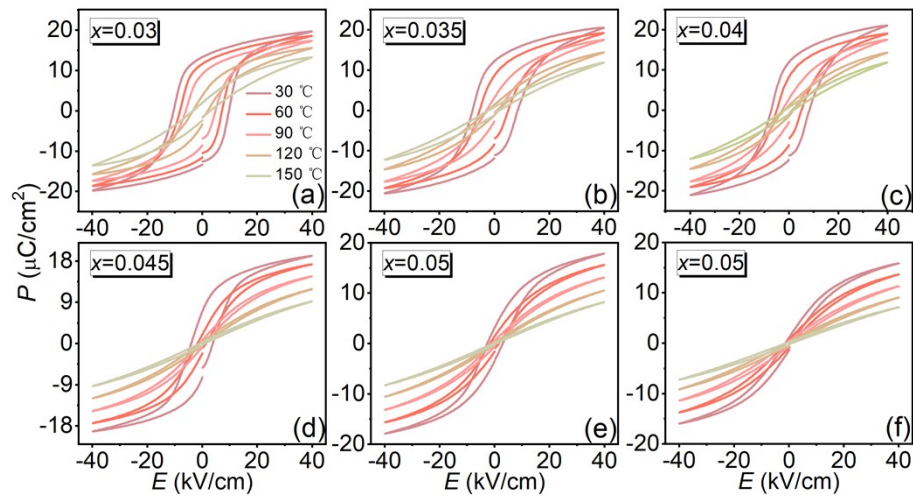**Fig. S1.**  $P$ - $E$  loops for NN-0.1BT- $x$ BZ ceramics with (a)  $x = 0.03$ , (b) 0.035, (c) 0.04, (d) 0.45, (d) 0.05, and (f) 0.055 recorded under 40 kV/cm at several selected temperatures.

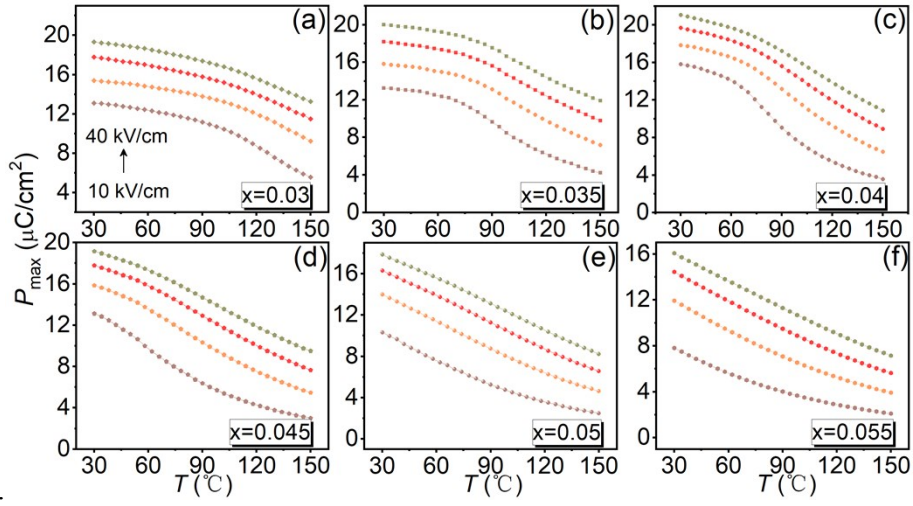

**Fig. S2.**  $P$ - $T$  loops for NN-0.1BT- $x$ BZ ceramics with (a)  $x = 0.03$ , (b) 0.035, (c) 0.04, (d) 0.45, (d) 0.05, and (f) 0.055 at 10-40 kV/cm, where  $P$  is obtained from the  $P_{\max}$  in each  $P$ - $E$  loop.

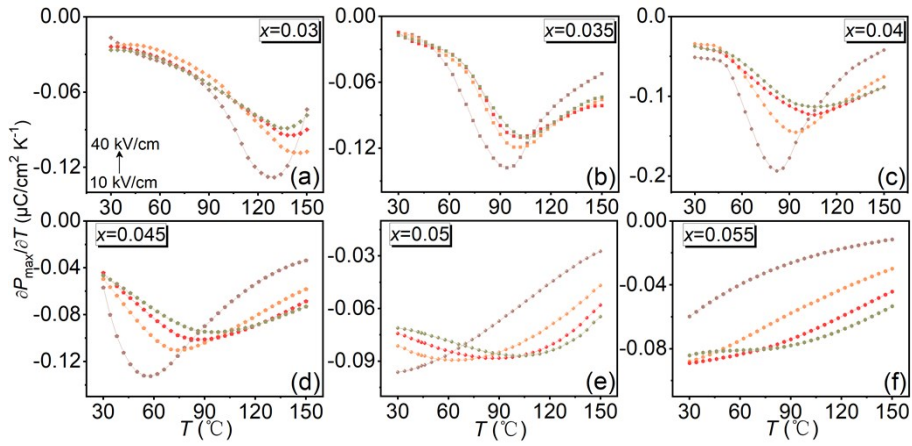

**Fig. S3.** Plots of  $(\partial P/\partial T)_E$ - $T$  for NN-0.1BT- $x$ BZ ceramics with (a)  $x = 0.03$ , (b) 0.035, (c) 0.04, (d) 0.45, (d) 0.05, and (f) 0.055 at 10-40 kV/cm.
